# Supplementary material for: Identification of the miRNA-mRNA regulatory pathways and a miR-21-5p based nomogram model in clear cell renal cell carcinoma
Source: PeerJ journal article supplement (doi:10.7717/peerj.10292), 2020-11-04

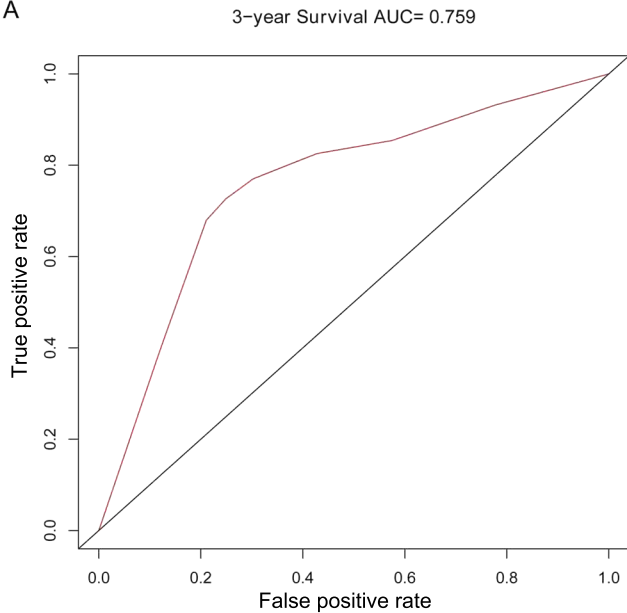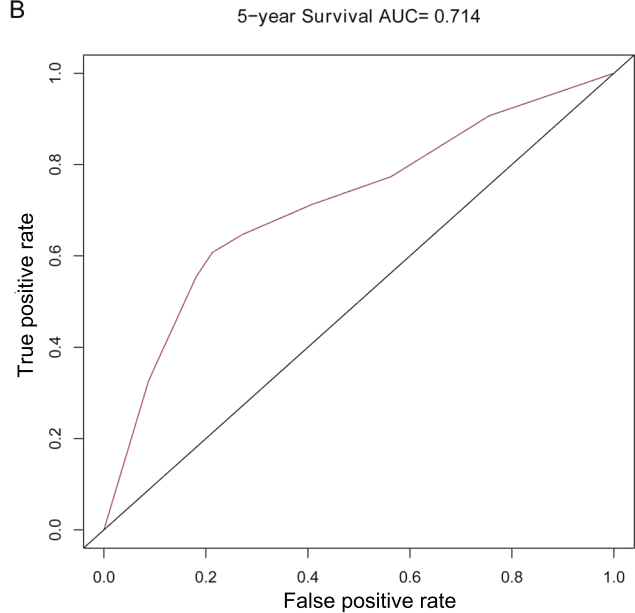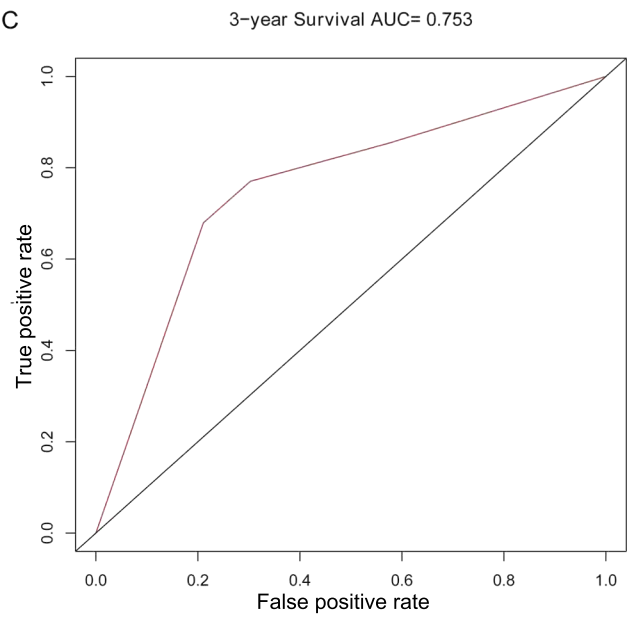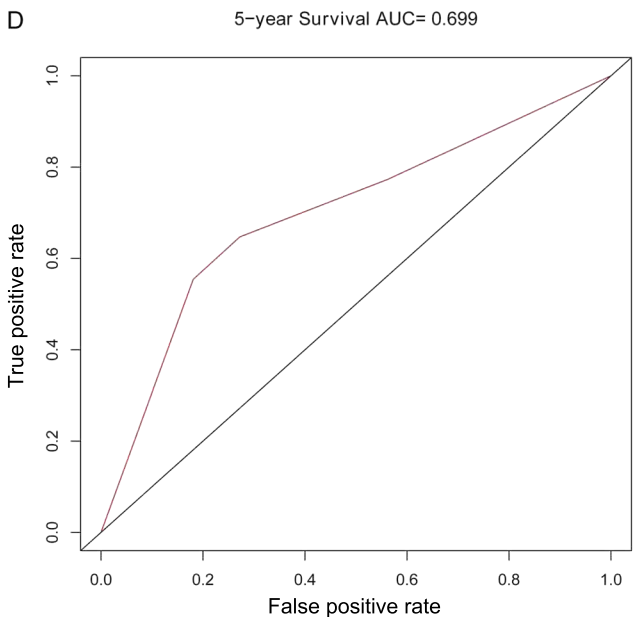

Supplement: Figure_S2.pdf [file Figure_S2.pdf]
