# Supplementary material for: Identification of the miRNA-mRNA regulatory pathways and a miR-21-5p based nomogram model in clear cell renal cell carcinoma
Source: PeerJ journal article supplement (doi:10.7717/peerj.10292), 2020-11-04
Supplement: Figure_S3.pdf [file Figure_S3.pdf]

A

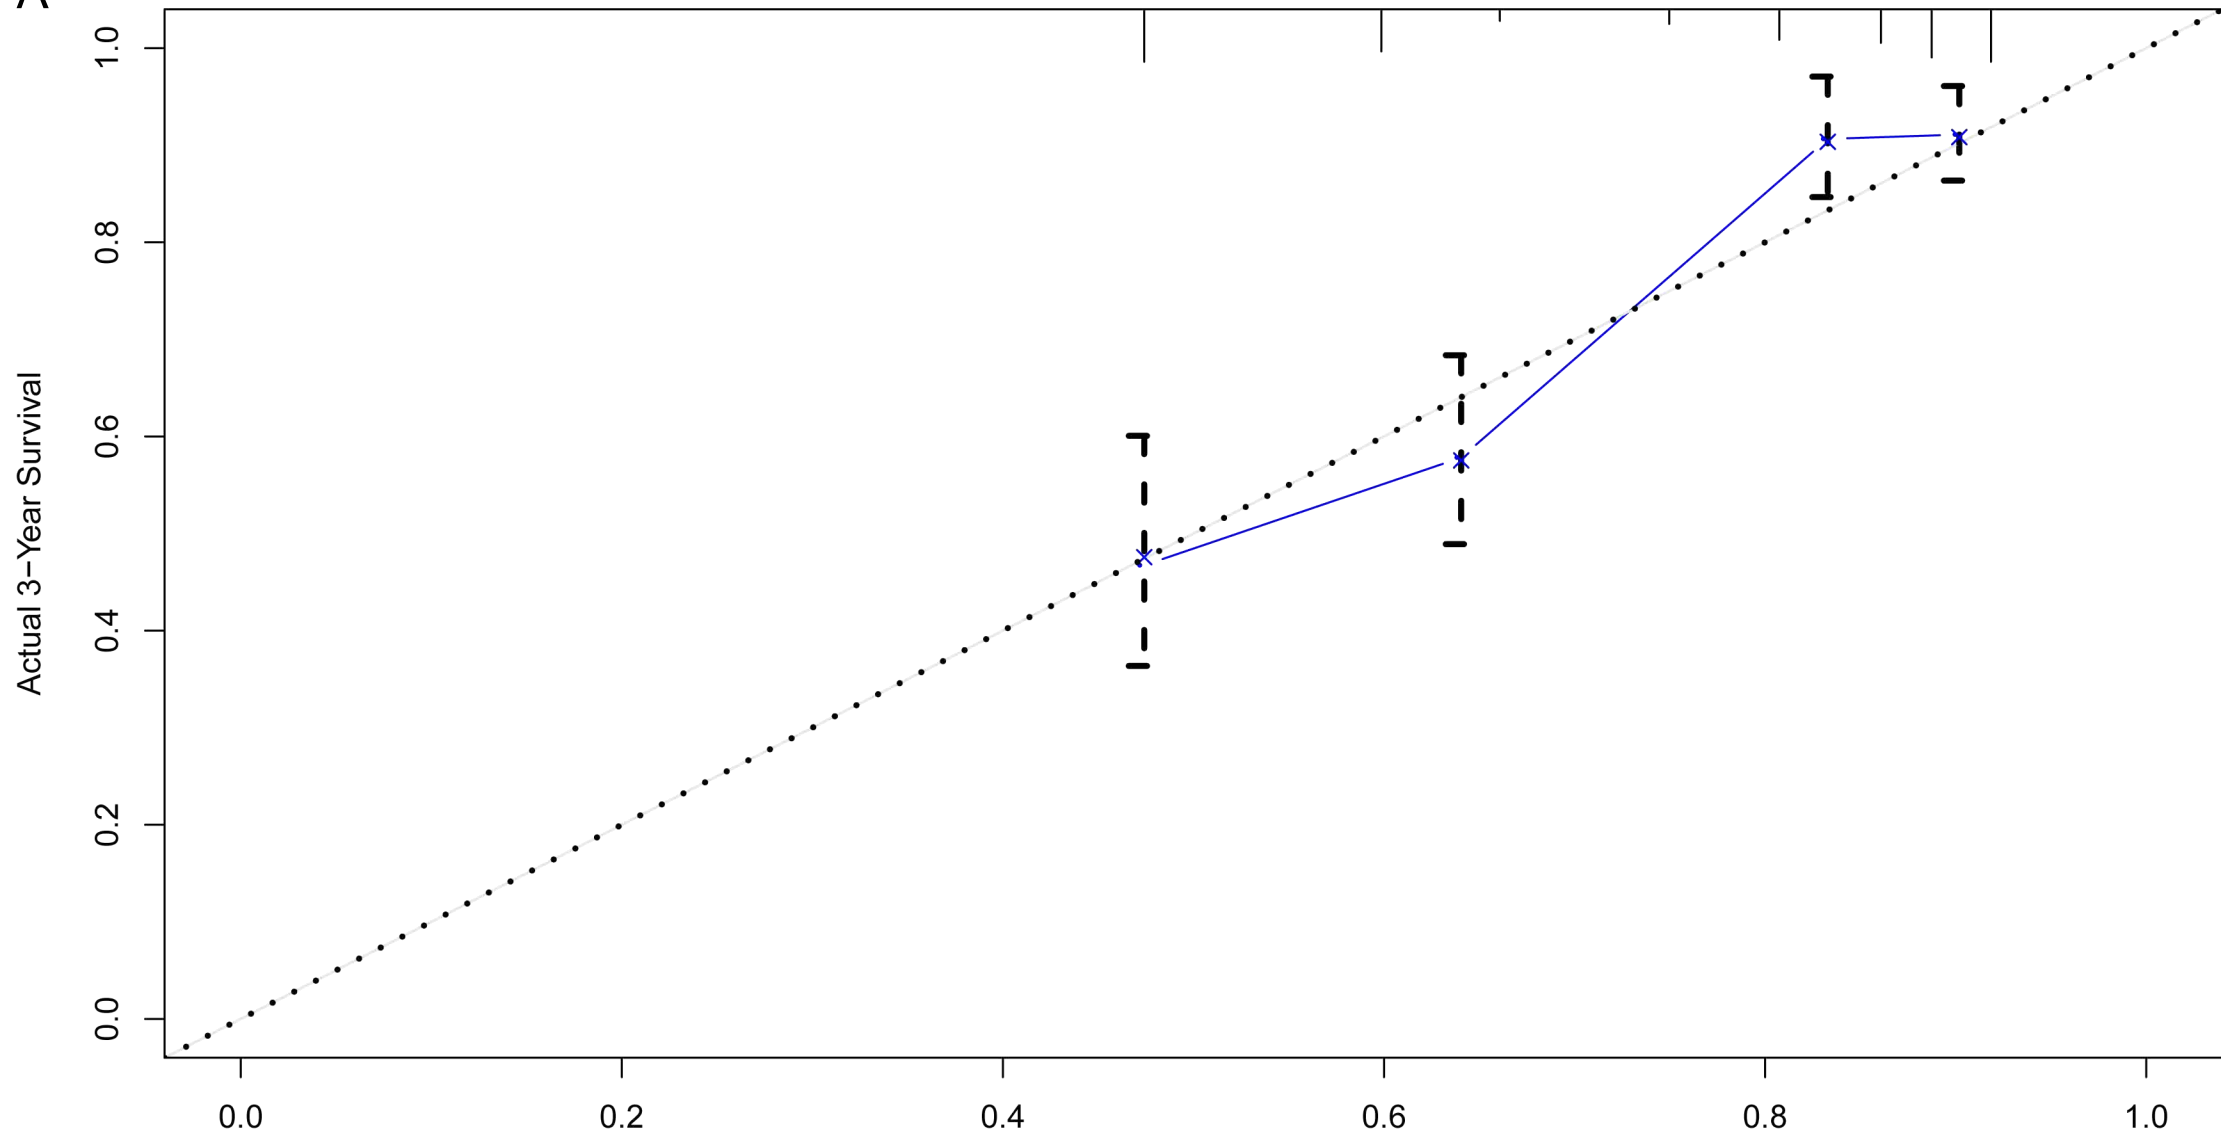

n=468 d=155 p=3, 110 subjects per group  
Gray: ideal

Nomogram-Predicted Probability of 3-Year Survival

X - resampling optimism added, B=1000  
Based on observed-predicted

B

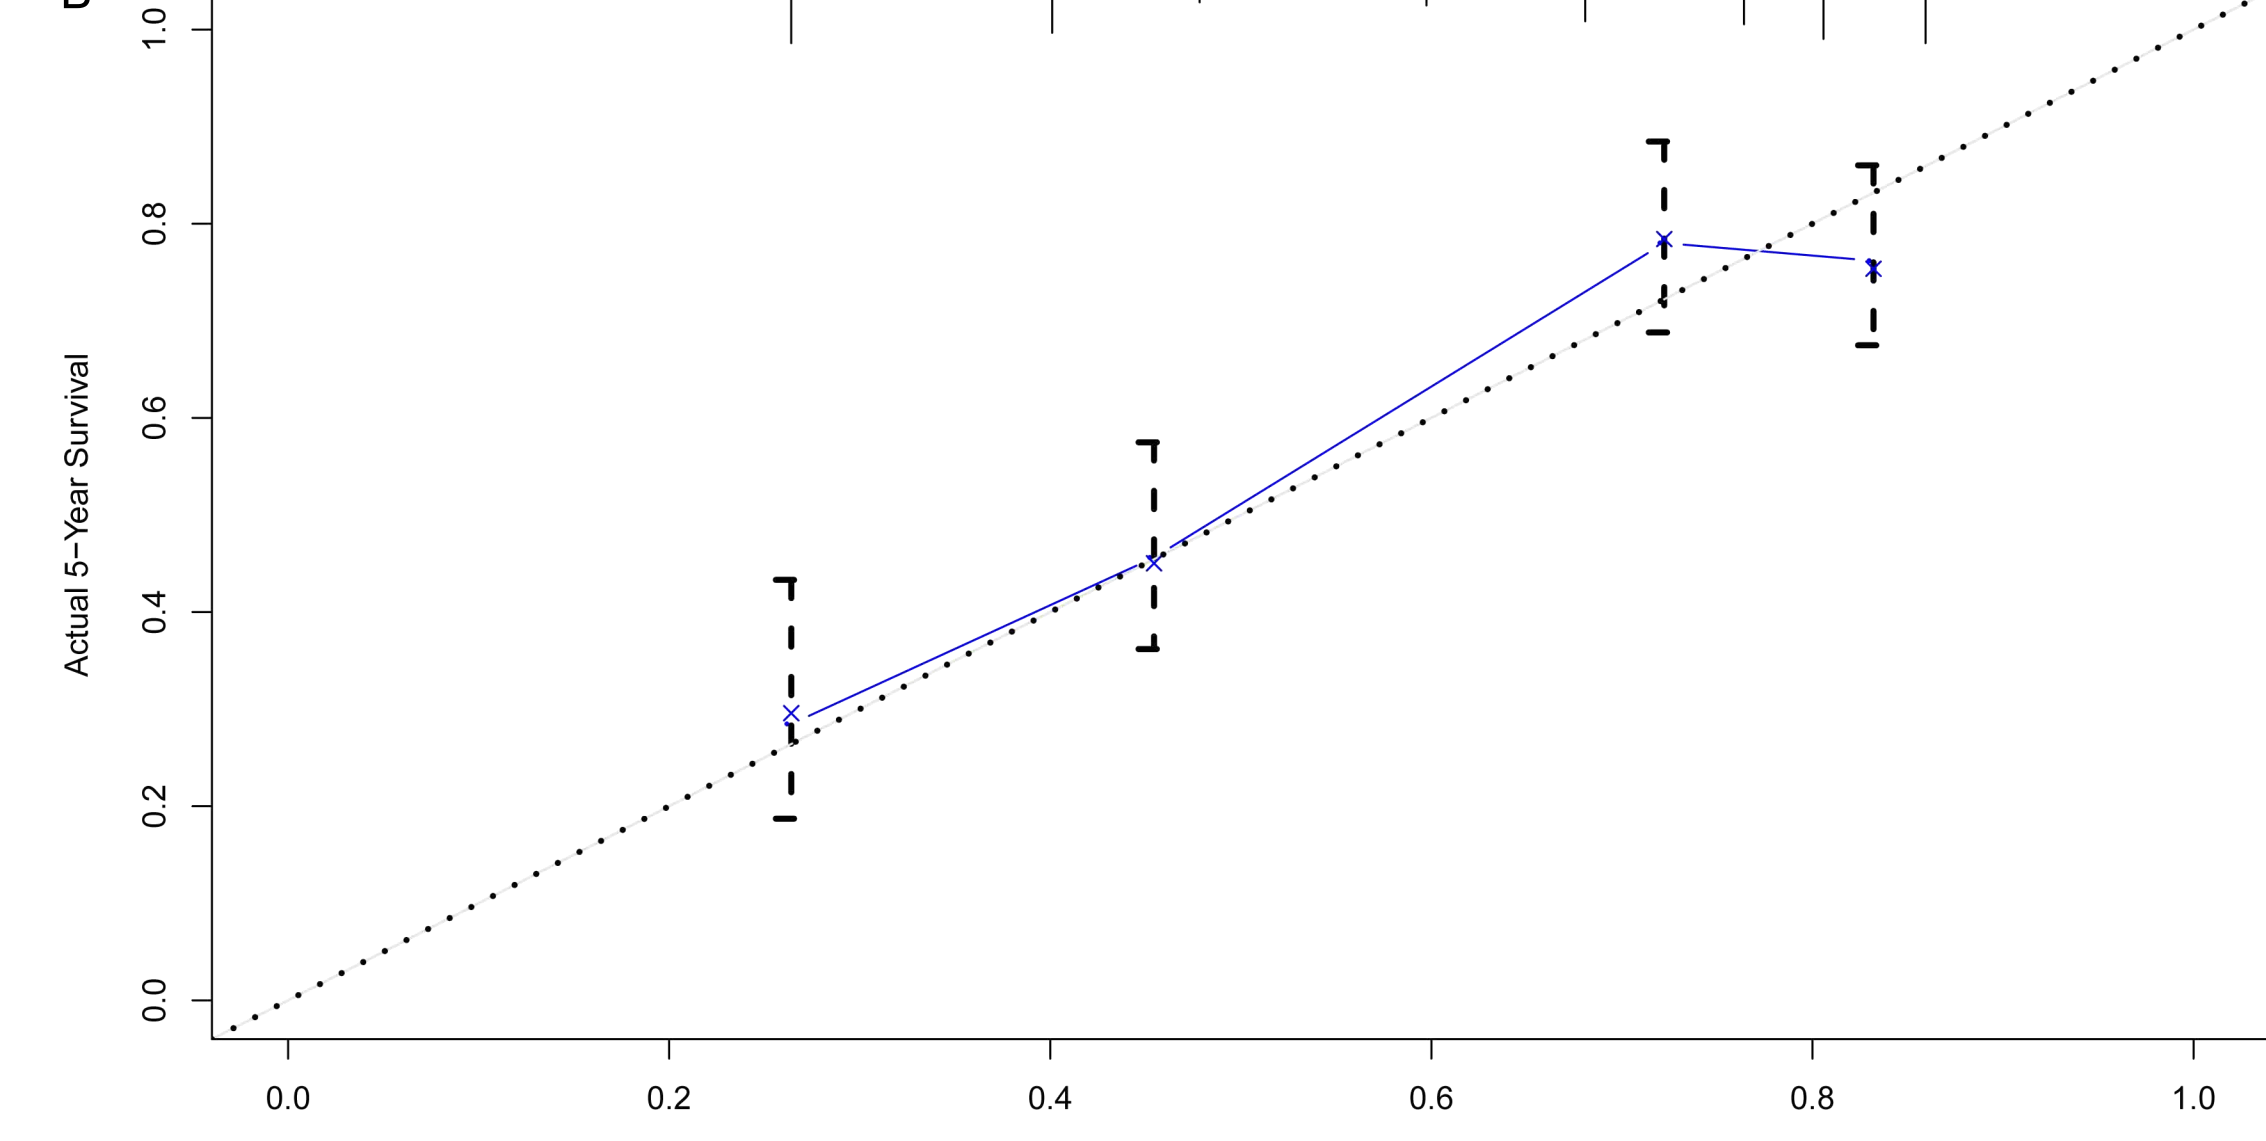

n=468 d=155 p=3, 110 subjects per group  
Gray: ideal

Nomogram-Predicted Probability of 5-Year Survival

X - resampling optimism added, B=1000  
Based on observed-predicted
